# Supplementary material for: Development and validation of a short adult coping scale (SACS) for use in general population large-scale assessment
Source: Research Square preprint supplement (doi:10.21203/rs.3.rs-4919523/v1), 2024-09-12
Supplement: Supplementary file 1 [file e3356e749a404159a9348795.docx]

**Supplementary File**

**Development and validation of a short adult coping scale (SACS) for use in large-scale assessments of the general population**

**SUP1. Umbrella-like review on existing coping scales**

The development of a short adult coping scale was based on a systematic literature search from June to July 2022 for existing reviews and meta-analyses on coping scales (i.e., umbrella review). The search was restricted to publications in English from the past 20 years (since 2002) and in peer-reviewed journals. The search strings were as follows:

- Scopus: ( TITLE ( coping* ) AND TITLE ( review ) OR TITLE ( meta AND analysis ) OR TITLE ( meta AND synthesis ) AND TITLE-ABS-KEY ( adult* ) ) AND ( LIMIT-TO ( PUBSTAGE , "final" ) ) AND ( LIMIT-TO ( PUBYEAR 2002-2022) AND ( LIMIT-TO ( LANGUAGE , "English" ) )
- PsycInfo: coping OR Keywords: coping AND Index Terms: "Coping Behavior" AND Any Field: "Peer Reviewed Journal" AND Age Group: Adulthood (18 yrs & older) AND Population Group: Human AND Methodology: Literature Review AND APA Full-Text Only AND Peer-Reviewed Journals only AND Year: 2002 To 2022.
- Pubmed: ((("coping"[Title] AND "adult"[Title/Abstract]) AND ((meta-analysis[Filter] OR review[Filter] OR systematic review[Filter]) AND (fft[Filter]) AND (2002/1/1:2022/6/28[pdat]) AND (english[Filter]))
- Google Scholar: Coping AND Review OR Meta-analysis AND Adult FILTER since 2002

The eligibility criteria for coping measurement instruments were:

- dispositional and not situational or scenario-based coping
- a comprehensive set of coping factors or types and not coping behaviors or single strategies
- relevant to the general adult population and not exclusively to younger or other specific target groups
- standardized questionnaires with acceptable indications of validity and reliability
- instruments without obligations to licensors

From a total of 140 records and 31 coping measurement instruments, 7 scales from 39 records met the eligibility criteria, as presented in Figure S1 and highlighted in boldface in the references below. The Brief COPE (n=16; Carver et al.,1989) and the Ways of Coping Checklist (n=13; Vitaliano et al., 1985) were most frequently mentioned in the eligible reviews, followed by the Coping Strategies Inventory (n=6; Tobin et al, 1989) and the Coping Strategy Indicator (n=5; Amirkhan, 1990).

To also consider more recently developed relevant concepts of coping that were not yet covered by the included reviews, an additional search was performed comprising the four concepts of proactive coping, coping flexibility, spiritual coping and information coping. This search resulted in two records each with two different or revised versions of a scale (see references below). A second additional search was performed to enhance comparability of coping factors across various areas of application. Thus, one review on coping concepts in the face of climate change, natural disaster, terrorism, and workplace bullying, complemented the already covered topics of chronic pain or illness and diverse potentially traumatic experiences.


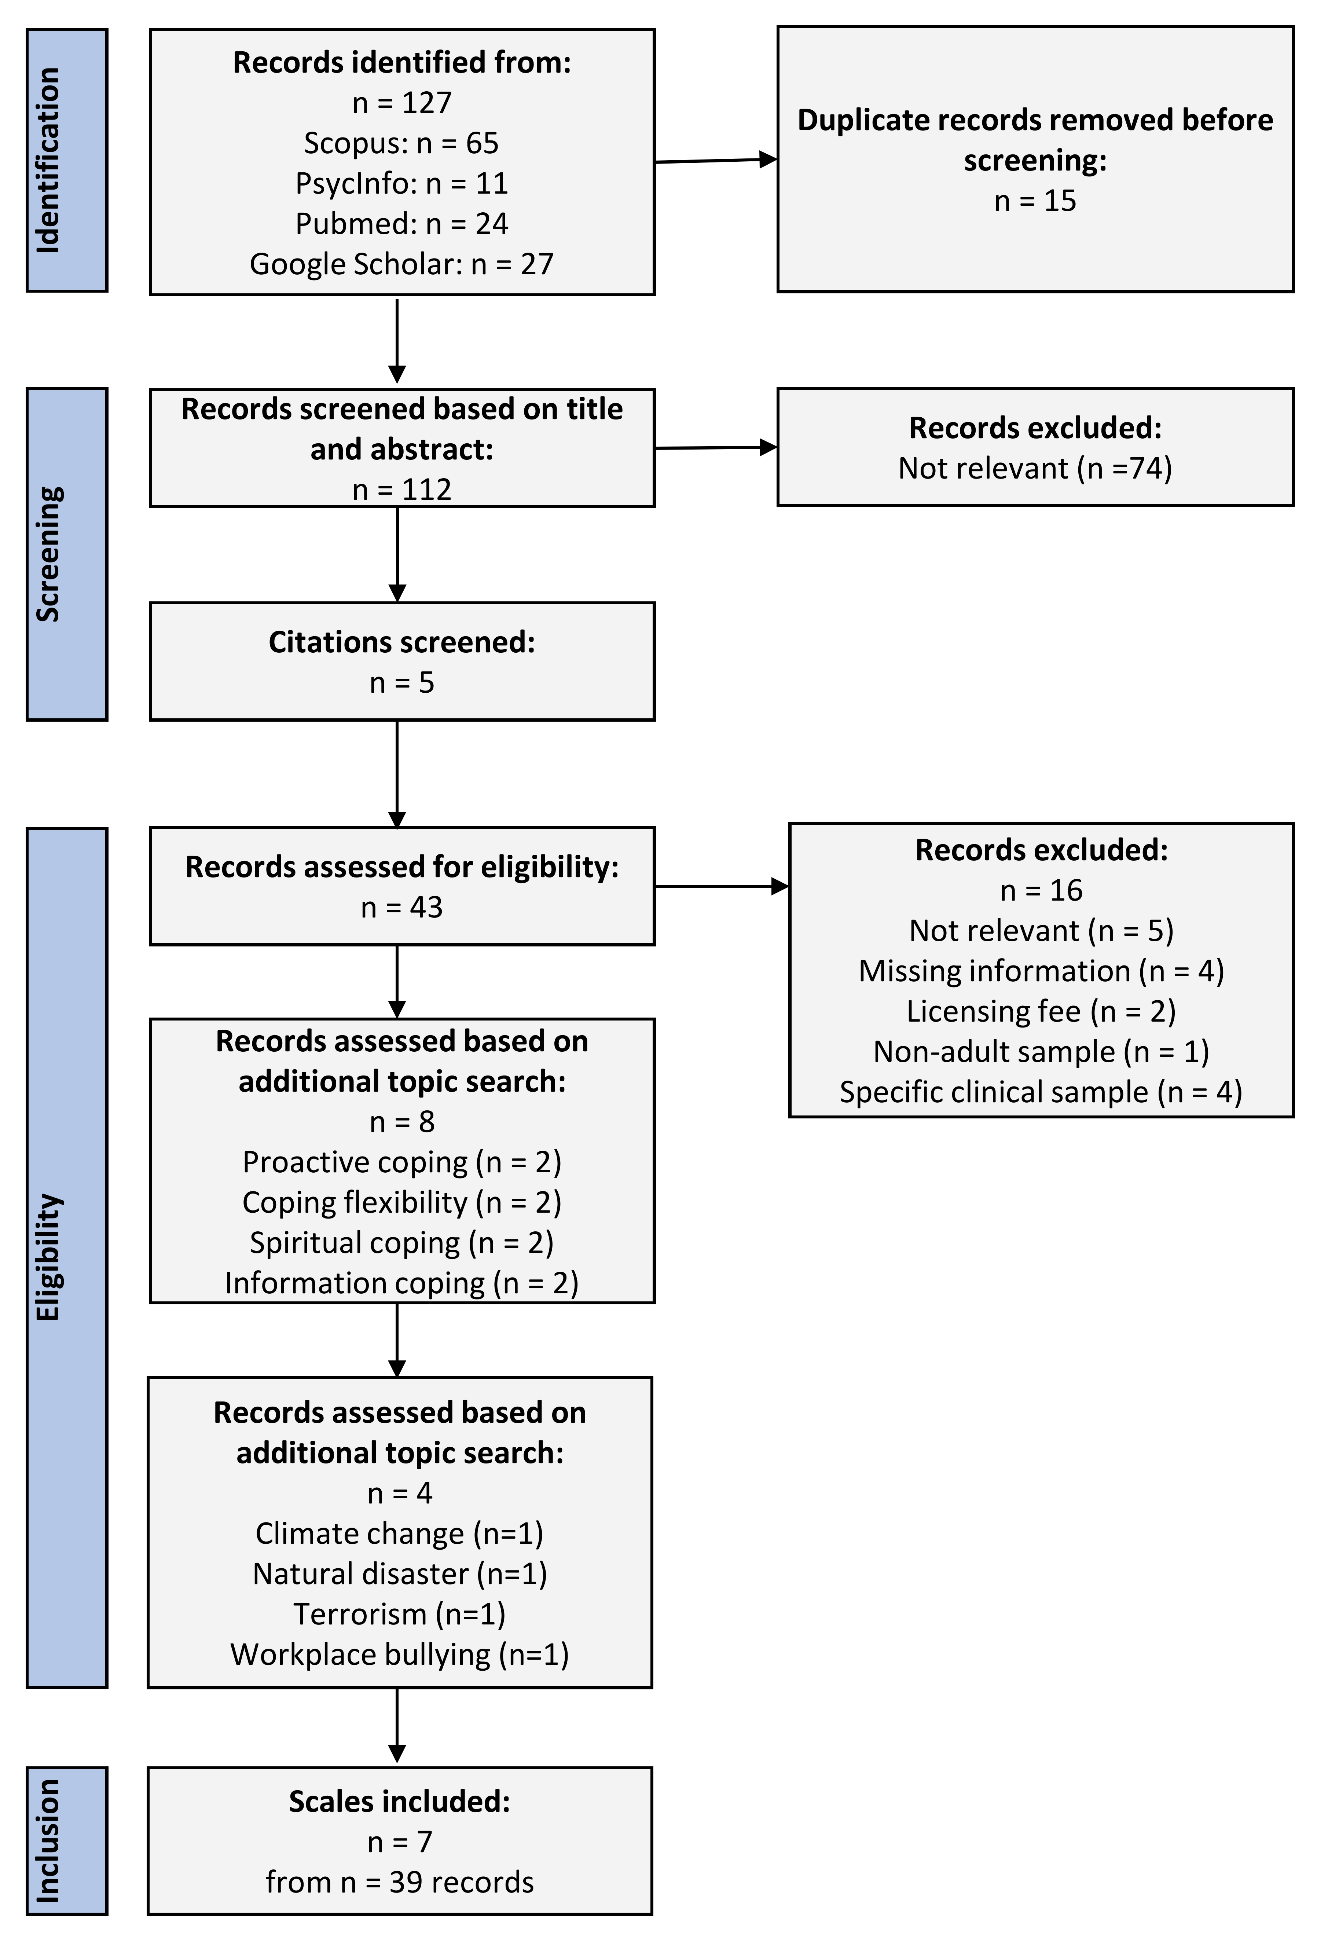


**Figure S1**

**Flowchart of the umbrella-like review to identify eligible coping instruments**

**References**

**Amirkhan JH. A factor analytically derived measure of coping: the coping strategy indicator. J Pers Soc Psychol. 1990;59(5):1066-74.**

Brandtstädter J, Renner G. Tenacious goal pursuit and flexible goal adjustment: explication and age-related analysis of assimilative and accommodative strategies of coping. Psychol Aging. 1990;5(1):58-67.

**Carver CS. You want to measure coping but your protocol's too long: consider the brief COPE. Int J Behav Med. 1997;4(1):92-100.**

**Charzyńska E. Multidimensional approach toward spiritual coping: construction and validation of the Spiritual Coping Questionnaire (SCQ). J Relig Health. 2015;54(5):1629-46.**

Cheng C, Lau HP, Chan MP. Coping flexibility and psychological adjustment to stressful life changes: a meta-analytic review. Psychol Bull. 2014;140(6):1582-607.

Christensen MV, Kessing LV. Clinical use of coping in affective disorder, a critical review of the literature. Clin Pract Epidemiol Ment Health. 2005;1(1):20.

Cook SW, Heppner PP. A psychometric study of three coping measures. Educ Psychol Meas. 1997;57(6):906-23.

de Ridder D. What is wrong with coping assessment? A review of conceptual and methodological issues. Psychol Health. 1997;12(3):417-31.

Endler NS, Parker JDA. Assessment of multidimensional coping: task, emotion, and avoidance strategies. Psychol Assess. 1994;6(1):50-60.

Ferring D, Filipp S-H. Bewältigung kritischer Lebensereignisse: Erste Erfahrungen mit einer deutschsprachigen Version der "Ways of Coping Checklist." ZDDP. 1989;10(4):189-99.

Fiore J. A systematic review of the dual process model of Coping With Bereavement (1999-2016). Omega (Westport). 2021;84(2):414-58.

Greenaway KH, Louis WR, Parker SL, Kalokerinos EK, Smith JR, Terry DJ. Measures of coping for psychological well-being. Measures of personality and social psychological constructs. San Diego, CA, US: Elsevier Academic Press; 2015. p. 322-51.

Gall TL, Guirguis-Younger M. Religious and spiritual coping: current theory and research. APA handbook of psychology, religion, and spirituality (Vol 1): Context, theory, and research. APA handbooks in psychology®. Washington, DC, US: American Psychological Association; 2013. p. 349-64.

Jensen MP, Turner JA, Romano JM, Karoly P. Coping with chronic pain: a critical review of the literature. Pain. 1991;47(3):249-83

Kato, T. (2012). Development of the Coping Flexibility Scale: evidence for the coping flexibility hypothesis. Journal of Counseling Psychology, *59*(2), 262-273. <https://doi.org/10.1037/a0027770>

Kato T. Development of the Coping Flexibility Scale: evidence for the coping flexibility hypothesis. J Couns Psychol. 2012;59(2):262-73.

**Kato T. Examination of the coping flexibility hypothesis using the Coping Flexibility Scale-Revised. Front Psychol. 2020;11:561731.**

Knoll N, Rieckmann N, Schwarzer R. Coping as a mediator between personality and stress outcomes: a longitudinal study with cataract surgery patients. Eur J Pers. 2005;19(3):229-47.

Littleton H, Horsley S, John S, Nelson DV. Trauma coping strategies and psychological distress: a meta-analysis. J Trauma Stress. 2007;20(6):977-88.

Maguen, Shira, Anthony Papa, and Brett T. Litz. Coping with the threat of terrorism: A review. *Anxiety, stress, and coping,* 21(1) (2008): 15-35.

Mah AYJ, Chapman DA, Markowitz EM, Lickel B. Coping with climate change: Three insights for research, intervention, and communication to promote adaptive coping to climate change. J Anxiety Disord. 2020;75:102282.

Moskowitz JT, Hult JR, Bussolari C, Acree M. What works in coping with HIV? A meta-analysis with implications for coping with serious illness. Psychol Bull. 2009;135(1):121-41.

Muris P, Van Zuuren FJ, De Jong PJ, De Beurs E, Hanewald G. Monitoring and blunting coping styles: the Miller behavioural style scale and its correlates, and the development of an alternative questionnaire. Pers Individ Dif. 1994;17(1):9-19.

Oakland S, Ostell A. Measuring coping: a review and critique. Hum Relat. 1996;49(2):133-55.

Parker JDA, Endler NS. Coping with coping assessment: a critical review. Eur J Pers. 1992;6(5):321-44.

Peres MF, Lucchetti G. Coping strategies in chronic pain. Curr Pain Headache Rep. 2010;14(5):331-8.

Roesch SC, Weiner B. A meta-analytic review of coping with illness: do causal attributions matter? J Psychosom Res. 2001;50(4):205-19.

Schetsche C, Jaume LC, Gago-Galvagno L, Elgier AM. Entwicklung und Validierung einer deutschsprachigen Kurzform des Coping Strategies Inventory Psychother Psychosom Med Psychol. 2021;71(9-10):396-405. [Development and validation of a German-language short form of the Coping Strategies Inventory.]

Schwarzer R, Schwarzer C. A critical survey of coping instruments. Handbook of coping: Theory, research, applications. Oxford, England: John Wiley & Sons; 1996. p. 107-32.

**Schwarzer R, Taubert S. Tenacious goal pursuits and striving toward personal growth: proactive coping. Beyond coping: Meeting goals, visions, and challenges. New York, NY, US: Oxford University Press; 2002. p. 19-35.**

Skinner EA, Edge K, Altman J, Sherwood H. Searching for the structure of coping: a review and critique of category systems for classifying ways of coping. Psychol Bull. 2003;129(2):216-69.

Skoufias E. Economic crises and natural disasters: coping strategies and policy implications. World Dev. 2003;31(7):1087-102.

Steptoe A. An abbreviated version of the Miller Behavioral Style Scale. Brit J Clin Psychol. 1989;28(2):183-4.

Stroebe MS, Schut H. Models of coping with bereavement: a review. Handbook of bereavement research: Consequences, coping, and care. Washington, DC, US: American Psychological Association; 2001. p. 375-403.

Tamres LK, Janicki D, Helgeson VS. Sex differences in coping behavior: a meta-analytic review and an examination of relative coping. Pers Soc Psychol Rev. 2002;6(1):2-30.

**Tobin D, Holroyd K, Reynolds R, Wigal J. The hierarchical structure of the Coping Strategies Inventory. Cognit Ther Res. 1989;13:343-61.**

Van den Brande W, Baillien E, De Witte H, Elst TV, Godderis L. The role of work stressors, coping strategies and coping resources in the process of workplace bullying: a systematic review and development of a comprehensive model. Aggress Violent Behav. 2016;29:61-71.

**Vitaliano PP, Russo J, Carr JE, Maiuro RD, Becker J. The ways of coping checklist: revision and psychometric properties. Multivariate Behav Res. 1985;20(1):3-26.**

Walsh K, Fortier MA, Dilillo D. Adult coping with childhood sexual abuse: a theoretical and empirical review. Aggress Violent Behav. 2010;15(1):1-13.

**SUP2. Scale validation in Study 1 and Study 2**

**Table SUP2.1 Descriptive statistics and internal consistencies for all validation scales as used in Study 1 and Study 2**

|  |  |  | **Study 1** (*N*=2,613) | | | **Study 2** (*N*=1,986) | | |
| --- | --- | --- | --- | --- | --- | --- | --- | --- |
| **Construct** | **# items** | **Scale** | **Mean** | **95% CI** | **α / *r*** | **Mean** | **95% CI** | **α / *r*** |
| Openness1 | 2 | 1-5 | 3.28 | 3.25-3.32 | .27 | 3.23 | 3.28-3.37 | .19 |
| Conscientousness1 | 2 | 1-5 | 3.70 | 3.67-3.73 | .31 | 3.79 | 3.75-3.83 | .29 |
| Extraversion1 | 2 | 1-5 | 3.06 | 3.02-3.10 | .51 | 3.02 | 2.98-3.07 | .46 |
| Agreeableness1 | 2 | 1-5 | 3.19 | 3.16-3.22 | .34 | 3.38 | 3.34-3.42 | .31 |
| Neuroticism1 | 2 | 1-5 | 2.77 | 2.74-2.81 | .45 | 2.76 | 2.72-2.91 | .46 |
| Optimism1 | 2 | 1-7 | 4.25 | 4.47-4.58 | .60 | 4.59 | 4.53-4.65 | .56 |
| Internal locus1 | 2 | 1-5 | 3.84 | 3.81-3.87 | .52 | 3.65 | 3.61-3.69 | .40 |
| External locus1 | 2 | 1-5 | 2.60 | 2.56-2.63 | .39 | 2.45 | 2.41-2.49 | .39 |
| Self-efficacy | 3 | 1-5 | 3.81 | 3.78-3.83 | .84 | 3.78 | 3.75-3.82 | .86 |
| Social support | 3 | 3-14 | 8.70 | 8.62-8.73 | .64 | 9.00 | 8.91-9.10 | .66 |
| Mental Well-being | 7 | 7-35 | 25.15 | 24.94-25.35 | .88 | 24.96 | 24.74-25.18 | .88 |
| Life satisfaction | 1 | 1-7/1-10 | 4.94 | 4.88-5.00 | -- | 6.75 | 6.66-6.84 | -- |
| Meaning of Life | 1 | 1-7/1-10 | 4.89 | 4.82-4.94 | -- | 7.05 | 6.96-7.14 | -- |
| Happiness | 1 | 1-7/1-10 | 4.98 | 4.92-5.03 | -- | 6.71 | 6.62-6.81 | -- |
| Depressive symptoms | 4 | 0-100 | 54.61 | 54.22-55.01 | .93 | 53.22 | 52.76-53.68 | .94 |
| Anxiety symptoms | 4 | 0-100 | 54.28 | 53.89-54.66 | .90 | 54.01 | 53.55-54.47 | .91 |
| Physical functioning | 4 | 0-100 | 49.18 | 48.85-49.52 | .92 | 49.87 | 49.49-50.27 | .93 |
| Fatigue | 4 | 0-100 | 52.91 | 52.47-53.35 | .95 | 51.51 | 51.00-52.01 | .94 |
| Pain interference | 4 | 0-100 | 53.03 | 52.65-53.40 | .96 | 51.60 | 51.16-52.04 | .97 |
| Sleep disturbance | 4 | 0-100 | 52.52 | 52.37-52.67 | .91 | 52.46 | 52.24-52.69 | .86 |
| Social functioning | 4 | 0-100 | 50.35 | 49.97-50.73 | .92 | 52.70 | 52.26-53.15 | .97 |

*Notes.* 1 Report of interitem correlation instead of Cronbach’s alpha. CI=Confidence interval.

**Table SUP2.2** **Correlations of validation scales with final 16- item short adult coping scale (SACS-16)**

|  | **Study 1** (*N*=2,613) | | | | | | | **Study 2** (*N*=1,986) | | | | | | | | |
| --- | --- | --- | --- | --- | --- | --- | --- | --- | --- | --- | --- | --- | --- | --- | --- | --- |
| **Construct (instrument)** | **F1** | **F2** | **F3** | **F4** | **F5** | **F6** | **F7** | **F8** | **F1** | **F2** | **F3** | **F4** | **F5** | **F6** | **F7** | **F8** |
| Openness | .15** | .07** | .11** | .07** | .06** | -.10** | .03 | .16** | .10** | .06* | .15** | .12** | .17** | -.04 | .09** | .17** |
| Conscientousness | -.03 | .02 | .20** | .19** | .24** | -.24** | -.16** | .09** | .00 | -.03 | .25** | .23** | .26** | -.28** | -.16** | .12** |
| Extraversion | .21** | .17** | .19** | .15** | .23** | -.09** | -.08** | .18** | .30** | .26** | .28** | .29** | .22** | -.07* | -.09** | .26** |
| Agreeableness | .11** | .09** | .12** | .10** | .05 | -.01 | -.06** | .14** | .08** | .05* | .04 | .09** | .05* | -.12** | -.08** | .10** |
| Neuroticism | -.01 | -.06** | -.21** | -.30** | -.30** | .29** | .25** | -.14** | -.02 | -.08 | -.31** | -.40** | -.24** | .25** | .27** | -.21** |
| Optimism | .15** | .14** | .22** | .29** | .28** | -.22** | -.19** | .25** | .17** | .19** | .33** | .39** | .30** | -.22** | -.18** | .27** |
| Internal locus | .12** | .09** | .24** | .27** | .32** | -.10** | -.07** | .19** | .25** | .26** | .45** | .44** | .41** | -.04 | -.01 | .35** |
| External locus | .06** | .00 | -.07** | -.12** | -.18** | .38** | .28** | .01 | .08** | .09** | -.04 | -.07** | -.04 | .37** | .28** | .05* |
| Self-efficacy | .06** | .08** | .33** | .30** | .40** | -.23** | -.13** | .18** | .17** | .16** | .45** | .44** | .42** | -.09** | -.06* | .33** |
| Social support | .25** | .30** | .21** | .21** | .23** | -.16** | -.06** | .08** | .35** | .35** | .29** | .31** | .30** | -.11** | -.06* | .23** |
| Mental well-being | .14** | .20** | .33** | .29** | .38** | -.24** | -.22** | .19** | .28** | .27** | .51** | .55** | .48** | -.22** | -.16** | .35** |
| Life satisfaction | .12** | .17** | .23** | .23** | .31** | -.19** | -.19** | .18** | .15** | .18** | .28** | .34** | .24** | -.14** | -.17** | .27** |
| Meaning of Life | .14** | .16** | .24** | .27** | .32** | -.17** | -.18** | .17** | .15** | .18** | .27** | .34** | .24** | -.18** | -.20** | .26** |
| Happiness | .13** | .18** | .28** | .27** | .36** | -.17** | -.15** | .20** | .16** | .18** | .33** | .37** | .30** | -.18** | -.17** | .25** |
| Depressive symptoms | -.13** | -.09** | -.10** | -.09** | -.16** | .14** | .12** | -.10** | .02 | .00 | -.23** | -.26** | -.18** | .41** | .35** | -.07** |
| Anxiety symptoms | .07** | -.01 | -.13** | -.15** | -.23** | .38** | .31** | -.02 | .08** | .04 | -.21** | -.22** | -.15** | .40** | .36** | -.01 |
| Physical functioning | .03 | .05** | .06** | .04 | .12** | -.22** | -.08** | .08** | .01 | .00 | .10** | .11** | .10** | -.23** | -.08** | .06** |
| Fatigue | .04* | -.08** | -.14** | -.18** | -.17** | .31** | .24** | -.05** | .06* | .02 | -.14** | -.23** | -.10** | .32** | .29** | -.09** |
| Pain interference | .01 | -.05** | -.02 | -.01 | -.08** | .27** | .10** | -.03 | .03 | .03 | -.06* | -.05* | -.03 | .29** | .14** | .02 |
| Sleep disturbance | -.11** | -.12** | -.10** | -.06** | .-12** | .11** | .00 | .10** | -.03 | -.03 | -.13** | -.19** | -.10** | .22** | .19** | -.08** |
| Social functioning | .02 | .09** | .05* | .10** | .16** | -.30** | -.17** | .07** | .05* | .05* | .07** | .13** | .06* | -.31** | -.20** | -04* |

*Notes.* Pearson correlation coefficient. F1=emotional support, F2=instrumental support, F3=perseverance, F4=coping flexibility, F5=problem solving, F6=repression, F7=wishful thinking, F8=proactive coping. ** *p* <.01, * *p*<.05.

**Table SUP2.3 Correlations of validation scales with final 8-item short adult coping scale (SACS-8)**

|  | **Study 1** (*N*=2,613) | | | | **Study 2** (*N*=1,986) | | | |
| --- | --- | --- | --- | --- | --- | --- | --- | --- |
| **Construct (instrument)** | **F1** | **F2 (F2)** | **F3(F6)** | **F4(F7)** | **F1** | **F2 (F2)** | **F3(F6)** | **F4(F7)** |
| Openness | .07** | .07** | -.10** | .03 | .15** | .06* | -.04 | .09** |
| Conscientousness | .18** | .02 | -.24** | -.16** | .22** | -.03 | -.28** | -.16** |
| Extraversion | .14** | .17** | -.09** | -.08** | .26** | .26** | -.07* | -.09** |
| Agreeableness | .10** | .09** | -.01 | -.06** | .09** | .05* | -.12** | -.08** |
| Neuroticism | -.27** | -.06** | .29** | .25** | -.33** | -.08 | .25** | .27** |
| Optimism | .28** | .14** | -.22** | -.19** | .35** | .19** | -.22** | -.18** |
| Internal locus | .26** | .09** | -.10** | -.07** | .42** | .26** | -.04 | -.01 |
| External locus | -.08** | .00 | .38** | .28** | -.04 | .09** | .37** | .28** |
| Self-efficacy (ASKU-3) | .33** | .08** | -.23** | -.13** | .44** | .16** | -.09** | -.06* |
| Social support | .22** | .30** | -.16** | -.06** | .31** | .35** | -.11** | -.06* |
| Mental well-being | .33** | .20** | -.24** | -.22** | .52** | .27** | -.22** | -.16** |
| Life satisfaction (SWLS) | .25** | .17** | -.19** | -.19** | .31** | .18** | -.14** | -.17** |
| Meaning of Life | .26** | .16** | -.17** | -.18** | .29** | .18** | -.18** | -.20** |
| Happiness | .27** | .18** | -.17** | -.15** | .35** | .18** | -.18** | -.17** |
| Depressive symptoms (PROMIS-29) | -.07** | -.09** | .14** | .12** | -.22** | .00 | .41** | .35** |
| Anxiety symptoms (PROMIS-29) | -.15** | -.01 | .38** | .31** | -.19** | .04 | .40** | .36** |
| Physical functiong | .05** | .05** | -.22** | -.08** | .11** | .00 | -.23** | -.08** |
| Fatigue | -.16** | -.08** | .31** | .24** | -.16** | .02 | .32** | .29** |
| Pain interference | -.02 | -.05** | .27** | .10** | -.04* | .03 | .29** | .14** |
| Sleep disturbance | .09** | .12** | .11** | .00 | -.14** | -.03 | .22** | .19** |
| Social functioning (PROMIS-29) | .09** | .09** | -.30** | -.17** | .08** | .05* | .31** | .20** |

*Notes.* Pearson correlation coefficient, Factors 2, 3, and 4 of the 8-item version are equal to factors 2, 6, and 7 of the 16-item version. F1=active coping, F2=instrumental support, F3=repression, F4=wishful thinking. ** *p*<.01, * *p*<.05

**Measures.** Personality (openness, conscientiousness, extraversion, agreeableness, neuroticism) was measured with the German versions of the 10-item short version of the Big Five Personality Inventory (BFI-10; Rammstedt et al., 2013), optimism with the 2-item Optimism–Pessimism Short Scale–2 (SOP-2; Kemper et al., 2012; Nießen et al., 2022), locus of control with the 4-item Internal-External Locus of Control Short-Scale-4 (IE4; Kovaleva et al., 2012), self-efficacy with the Short Scale for Measuring General Self-efficacy Beliefs (ASKU-3; Beierlein et al, 2012;2017), perceived social support with the 3-item version of the Oslo Social Support Scale (OSSS-3; Kocalevent et al., 2018), mental well-being with the 7-item Short Warwick-Edinburgh Mental Wellbeing Scale (SWEMWBS; Stewart-brown, 2009; Peitz et al., 2024), satisfaction with life with the 1-item version of the Satisfaction With life Scale (SWL; Diener et al., 1985), Happiness with one item adapted from Abdel-Khalek (2006), meaning in life with the first item of the Meaning in Life Questionnaire (MLQ; Steger et al., 2006), and Health-related Quality of Life (Depression, Anxiety, Physical functioning, Fatigue, Pain interference, sleep disturbance, social functioning) with the 29-item version of the Patient Reported Outcomes Measurement Information System (PROMIS-29 Profile; Valderas & Alonso, 2008; Fischer et al, 2018).

**References of the used validation scales**

Abdel-Khalek AM. Measuring happiness with a single-item scale. Soc Behav Personal. 2006;34(2):139-50.

Beierlein C, Kovaleva A, Kemper CJ, Rammstedt B. Ein Messinstrument zur Erfassung subjektiver Kompetenzerwartungen: Allgemeine Selbstwirksamkeit Kurzskala (ASKU). GESIS-Working Papers, 2012/17. 2012. Available from: <https://nbn-resolving.org/urn:nbn:de:0168-ssoar-292351>.

Beierlein C, Kemper C, Kovaleva A, Rammstedt B. Short scale for measuring general self-efficacy beliefs (ASKU). Methods, data, analyses,2017, 7(2):28. Available from: <https://mda.gesis.org/index.php/mda/article/view/2013.014>.

Diener E, Emmons RA, Larsen RJ, Griffin S. The satisfaction with life scale. J Pers Assess. 1985;49(1):71-5.

Fischer F, Gibbons C, Coste J, Valderas JM, Rose M, Leplège A. Measurement invariance and general population reference values of the PROMIS Profile 29 in the UK, France, and Germany. Qual Life Res. 2018;27(4):999-1014.

Kemper CJ, Beierlein C, Kovaleva A, Rammstedt B. Eine Kurzskala zur Messung von Optimismus-Pessimismus: Die Skala Optimismus-Pessimismus-2 (SOP2) Mannheim: GESIS - Leibniz-Institut für Sozialwissenschaften; GeSIS Working paper, 2012/15. Available from: <https://www.gesis.org/fileadmin/kurzskalen/working_papers/SOP2_Workingpaper.pdf>

Kocalevent RD, Berg L, Beutel ME, Hinz A, Zenger M, Härter M, et al. Social support in the general population: standardization of the Oslo social support scale (OSSS-3). BMC Psychol. 2018;6(1):1-8.

Kovaleva, A. (2012). The IE-4: Construction and Validation of a Short Scale for the Assessment of Locus of Control. (GESIS-Schriftenreihe, 9). Köln: GESIS - Leibniz-Institut für Sozialwissenschaften. Available from: [https://zis.gesis.org/skala/Nie%C3%9Fen-Schmidt-Groskurth-Rammstedt-Lechner-Internal%E2%80%93External-Locus-of-Control-Short-Scale%E2%80%934-(IE-4)#](https://zis.gesis.org/skala/Nie%C3%9Fen-Schmidt-Groskurth-Rammstedt-Lechner-Internal%E2%80%93External-Locus-of-Control-Short-Scale%E2%80%934-(IE-4))

Nießen D, Groskurth K, Kemper CJ, Rammstedt B, Lechner CM. The Optimism–Pessimism Short Scale–2 (SOP2): a comprehensive validation of the English-language adaptation. Measurement Instruments for the Social Sciences, 2022; 4(1). Available from: <https://measurementinstrumentssocialscience.biomedcentral.com/counter/pdf/10.1186/s42409-021-00027-6.pdf>

Rammstedt B, Kemper C, Klein M, Beierlein C, Kovaleva A. A short scale for assessing the big five dimensions of personality: 10 Item Big Five Inventory (BFI-10). Methods, data, analyses, 2013;7(2):233-49. Available from: <https://mda.gesis.org/index.php/mda/article/view/2013.013>

Steger M, Frazier P, Oishi S, Kaler M. The Meaning in Life Questionnaire: assessing the presence of and search for meaning in life. J Couns Psychol. 2006;53:80–93.

Stewart-Brown S, Tennant A, Tennant R, Platt S, Parkinson J, Weich S. Internal construct validity of the Warwick-Edinburgh Mental Well-being Scale (WEMWBS): A Rasch analysis using data from the Scottish Health Education Population Survey. Health Qual Life Outcomes. 2009;7(15).

Valderas JM, Alonso J. Patient reported outcome measures: a model-based classification system for research and clinical practice. Qual Life Res. 2008;17(9):1125-35.

**SUP3. Results from Scale Development in Study 1 (*N*=2,613)**

**Item reduction from 143 to 42.** Based on the criteria of curtosis and skewness (< +/- 2), item ambiguity, KMO >.70 and loadings <.40 the initial number of 143 items was reduced to 42. Results from parallel analysis indicated 8 components and 5 factors with an overall MSA of .85 (Figure S2.1). Minimum Average Partial Test (MAP) achieved a minimum of 0.01 and the Very Simple Structure Criterion (VSS) with 8 factors a maximum of 0.67 complexity with 5 factors while the BIC=1263.76, sample size-adjusted BIC=492.86 and SRMR=.026 achieved a minimum with 8 factors. Comparison of results from exploratory factorial analyses (EFA) with oblimin rotation suggested a superior fit of the eight-factor solution (5 factors: TLI=.74, RMSEA=.08, RMSR=.05, BIC=332.08, R2=.39; 8 factors: TLI=.90, RMSEA=.04, RMSR=.02, BIC=70.83, R2=.46).


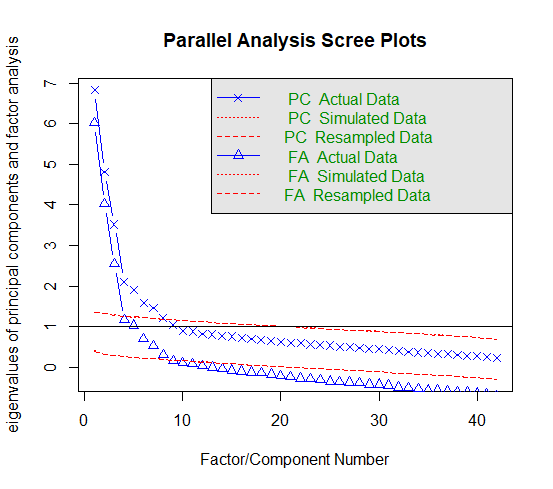


**Figure SUP3.1 Scree Plot with 42 items**

**Table SUP3.1 Results from EFA: Loadings for 42 items and 8 factors**

| **Inventory** | **Item #** | **Subscale** | **F 1** | **F 2** | **F 3** | **F 4** | **F 5** | **F6** | **F 7** | **F 8** |
| --- | --- | --- | --- | --- | --- | --- | --- | --- | --- | --- |
| CSI | 1 | support-focused | 0.76 | 0.06 | -0.02 | -0.04 | -0.1 | -0.01 | -0.01 | 0.07 |
| CSI | 23 | support-focused | 0.75 | -0.08 | -0.03 | 0.06 | -0.11 | -0.08 | 0.03 | 0.10 |
| CSI | 7 | support-focused | 0.74 | -0.04 | 0.05 | 0.05 | 0.09 | 0.1 | -0.04 | -0.10 |
| CSI | 14 | Social support | 0.68 | -0.08 | 0.11 | 0.05 | 0.12 | 0.14 | -0.09 | -0.07 |
| CSI-SF | 13 | support-focused | 0.68 | 0.08 | 0.04 | -0.08 | 0.13 | -0.08 | 0.04 | -0.11 |
| CSI | 25 | support-focused | 0.65 | 0.07 | 0.02 | -0.02 | 0.01 | -0.03 | 0.06 | 0.11 |
| CSI | 32 | support-focused | 0.61 | 0.08 | -0.1 | -0.05 | <0.01 | 0.04 | -0.01 | 0.08 |
| Brief COPE | 10 | Instrumental Support | 0.58 | 0.02 | -0.07 | 0.01 | 0.03 | -0.05 | 0.11 | -0.07 |
| CSI-SF | 18 | Social withdrawel | 0.55 | -0.01 | 0.03 | 0.04 | -0.05 | 0.02 | 0.05 | 0.18 |
| CSI-SF | 1 | Problem solving | 0.00 | 0.67 | 0.00 | -0.03 | 0.09 | -0.08 | -0.01 | -0.06 |
| CSI | 16 | problem-focused | -0.07 | 0.61 | 0.03 | 0.08 | -0.05 | 0.01 | -0.08 | -0.07 |
| CSI-SF | 19 | Active Coping | 0.01 | 0.59 | 0.03 | 0.12 | -0.02 | -0.07 | 0.02 | 0.01 |
| Brief COPE | 2 | Problem solving | 0.1 | 0.58 | 0.02 | -0.04 | 0.00 | 0.01 | 0.04 | 0.00 |
| CSI | 20 | problem-focused | 0.00 | 0.55 | 0.05 | 0.13 | -0.01 | -0.03 | 0.00 | 0.02 |
| WCC-R | 55 | problem-focused | 0.06 | 0.55 | 0.00 | 0.06 | 0.00 | 0.09 | -0.09 | -0.01 |
| WCC-R | 51 | problem-focused | -0.04 | 0.54 | 0.05 | 0.07 | -0.03 | 0.03 | 0.04 | 0.09 |
| CSI | 11 | problem-focused | -0.03 | 0.53 | 0.07 | 0.08 | 0.06 | 0.03 | 0.03 | 0.11 |
| WCC-R | 44 | problem-focused | 0.08 | 0.53 | 0.00 | 0.00 | 0.04 | 0.15 | 0.02 | -0.01 |
| CSI | 31 | support-focused | -0.02 | 0.04 | 0.77 | 0.01 | -0.08 | -0.03 | -0.02 | 0.02 |
| CSI-SF | 22 | support seeking | 0.03 | -0.02 | 0.77 | 0.07 | -0.06 | 0.03 | -0.05 | 0.03 |
| CSI | 24 | support-focused | -0.03 | -0.02 | 0.76 | 0.03 | 0.05 | 0.09 | -0.03 | -0.05 |
| CSI | 12 | problem-focused | 0.02 | 0.02 | 0.67 | -0.07 | 0.07 | -0.08 | 0.16 | -0.02 |
| CSI-SF | 4 | Social support | 0.05 | 0.11 | 0.59 | -0.06 | 0.01 | -0.07 | 0.09 | 0.11 |
| CFS-R | 11 | meta-coping | 0.05 | 0.03 | 0.07 | 0.69 | 0.11 | -0.02 | 0.03 | -0.08 |
| CFS-R | 8 | abandonment | -0.04 | 0.01 | -0.02 | 0.67 | -0.08 | -0.02 | 0.04 | 0.05 |
| CFS-R | 6 | re-coping | 0.00 | 0.13 | -0.02 | 0.62 | -0.06 | 0.03 | 0.00 | 0.10 |
| CFS-R | 4 | meta-coping | 0.00 | 0.12 | 0.04 | 0.59 | 0.06 | -0.02 | -0.07 | -0.05 |
| CSI | 29 | avoidant-focused | -0.05 | 0.06 | -0.03 | -0.02 | 0.65 | -0.03 | -0.04 | 0.00 |
| CSI | 9 | support-focused | 0.01 | -0.02 | -0.03 | 0.01 | 0.58 | -0.07 | 0.08 | 0.11 |
| CSI-SF | 10 | Problem solving | 0.05 | 0.08 | -0.02 | -0.02 | 0.57 | 0.05 | -0.10 | 0.11 |
| Brief COPE | 7 | Active Coping | 0.01 | 0.06 | 0.02 | 0.01 | 0.54 | -0.10 | -0.01 | 0.05 |
| CSI | 3 | problem-focused | 0.09 | -0.13 | -0.05 | 0.14 | 0.5 | 0.04 | 0.02 | 0.08 |
| WCC-R | 56 | emotion-focused | 0.04 | 0.04 | -0.02 | -0.02 | -0.02 | 0.66 | 0.05 | -0.01 |
| Brief COPE | 11 | Substance Use | 0.02 | -0.09 | 0.02 | 0.05 | 0.02 | 0.63 | 0.01 | 0.01 |
| Brief COPE | 3 | Denial | -0.05 | 0.09 | -0.01 | -0.02 | -0.11 | 0.62 | 0.13 | 0.05 |
| WCC-R | 37 | emotion-focused | 0.04 | -0.04 | 0.02 | -0.1 | 0.01 | 0.46 | 0.14 | 0.00 |
| CSI | 10 | avoidant-focused | 0.02 | -0.02 | 0.01 | 0.03 | -0.04 | 0.01 | 0.84 | -0.03 |
| CSI | 27 | avoidant-focused | -0.03 | 0.02 | 0.05 | 0.03 | 0.05 | 0.06 | 0.63 | 0.03 |
| WCC-R | 65 | emotion-focused | 0.02 | -0.02 | <0.01 | -0.08 | 0.01 | 0.24 | 0.56 | -0.04 |
| PCI | 1 | proactive coping | 0.02 | 0.05 | 0.04 | -0.03 | 0.08 | 0.06 | -0.13 | 0.65 |
| PCI | 17 | proactive coping | 0.07 | -0.03 | 0.07 | -0.02 | 0.08 | -0.02 | <0.01 | 0.61 |
| PCI | 5 | proactive coping | 0.06 | -0.08 | -0.05 | 0.16 | 0.16 | -0.01 | 0.08 | 0.49 |
|  |  | Cronbach’s Alpha | 0.56 | 0.82 | 0.58 | 0.39 | 0.80 | 0.83 | 0.59 | 0.86 |
|  |  | Eigenvalues | 4.25 | 3.38 | 2.76 | 2.05 | 1.93 | 1.76 | 1.74 | 1.37 |
|  |  | Proportion variance | 0.10 | 0.08 | 0.07 | 0.05 | 0.05 | 0.04 | 0.04 | 0.03 |
|  |  | Cumulative variance | 0.10 | 0.18 | 0.25 | 0.30 | 0.34 | 0.38 | 0.43 | 0.46 |

*Notes.* CSI-SF=Coping Strategies Inventory Short Form; WCC-R=Ways of Coping Checklist revised; CSI=Coping Strategy Indicator; PCI= Proactive Coping Inventory; SCQ= Spiritual Coping Questionnaire; CFS-R Coping Flexibility Scale revised.

**Item reduction from 42 to 25.** A Confirmatory Factor Analysis (CFA) with the 42 items distributed over the eight-factor structure showed non-satisfactory model fit (CFI=.90, TLI=.89, RMSEA=.05, RMSR=.04, AIC=89411.49, BIC=89866.93). Inspection of modification indices suggested to remove step-by-step 17 items with high interitem correlations (values of > 25). Another CFA with the 25 remaining items suggested an improved model fit, CFI=.93, TLI=.92, RMSEA=.04, RMSR=.04, AIC=75490.01, BIC=75893.70.

**Table SUP3.2 Results from CFA: Estimates for 25 items and 8 factors**

|  | Unstand. estimate | *SE* | Stand. estimate | *p* |
| --- | --- | --- | --- | --- |
| **Latent factors** |  |  |  |  |
| Emotional Support~ |  |  |  |  |
| CSI 1 | 0.71 | 0.024 | 0.73 | <.001 |
| CSI 7 | 0.69 | 0.025 | 0.72 | <.001 |
| CSI 25 | 0.67 | 0.024 | 0.72 | <.001 |
| CSI 32 | 0.61 | 0.024 | 0.66 | <.001 |
| Active Coping: Perseverance~ |  |  |  |  |
| CSI-SF 1 | 0.46 | 0.022 | 0.62 | <.001 |
| CSI-SF 19 | 0.51 | 0.022 | 0.68 | <.001 |
| Brief COPE 2 | 0.41 | 0.025 | 0.52 | <.001 |
| CSI 20 | 0.52 | 0.023 | 0.66 | <.001 |
| WCC-R 55 | 0.41 | 0.024 | 0.54 | <.001 |
| WCC-R 51 | 0.45 | 0.024 | 0.59 | <.001 |
| Instrumental Support~ |  |  |  |  |
| CSI-SF 22 | 0.73 | 0.021 | 0.80 | <.001 |
| CSI 24 | 0.71 | 0.021 | 0.77 | <.001 |
| CSI 31 | 0.71 | 0.021 | 0.78 | <.001 |
| CSI 12 | 0.64 | 0.025 | 0.66 | <.001 |
| Coping Flexibility~ |  |  |  |  |
| CFS-R 8 | 0.51 | 0.028 | 0.60 | <.001 |
| CFS-R 6 | 0.62 | 0.022 | 0.76 | <.001 |
| CFS-R 4 | 0.60 | 0.025 | 0.70 | <.001 |
| Active Coping: Problem Solving ~ |  |  |  |  |
| CSI 9 | 0.46 | 0.043 | 0.59 | <.001 |
| Brief COPE 7 | 0.40 | 0.036 | 0.51 | <.001 |
| Avoidance: Repression~ |  |  |  |  |
| WCC-R 56 | 0.42 | 0.037 | 0.48 | <.001 |
| WCC-R 37 | 0.59 | 0.047 | 0.58 | <.001 |
| Avoidance: Wishful Thinking~ |  |  |  |  |
| CSI 10 | 0.75 | 0.034 | 0.76 | <.001 |
| CSI 27 | 0.74 | 0.035 | 0.76 | <.001 |
| Proactive Coping~ |  |  |  |  |
| PCI 17 | 0.52 | 0.040 | 0.59 | <.001 |
| PCI 5 | 0.57 | 0.042 | 0.66 | <.001 |
| **Covariances** |  |  |  |  |
| Emotional Support ~~ |  |  |  |  |
| Active Coping: Perserverance | 0.19 | 0.036 | 0.19 | <.001 |
| Instrumental Support | 0.11 | 0.035 | 0.11 | .001 |
| Coping Flexibility | 0.08 | 0.037 | 0.08 | .022 |
| Active Coping: Problem Solving | 0.36 | 0.047 | 0.36 | <.001 |
| Avoidance: Repression | 0.23 | 0.052 | 0.23 | <.001 |
| Avoidance: Wishful Thinking | 0.12 | 0.036 | 0.12 | .002 |
| Proactive Coping | 0.44 | 0.045 | 0.44 | <.001 |
| Problem Solving: Perseverance ~~ |  |  |  |  |
| Instrumental Support | 0.45 | 0.033 | 0.45 | <.001 |
| Coping Flexibility | 0.64 | 0.031 | 0.64 | <.001 |
| Problem Solving: Active Coping | 0.20 | 0.051 | 0.20 | <.001 |
| Avoidance: Repression | -0.16 | 0.056 | -0.16 | .004 |
| Avoidance: Wishful thinking | -0.02 | 0.042 | -0.02 | .589 |
| Proactive Coping | 0.13 | 0.043 | 0.13 | .002 |
| Instrumental Support ~~ |  |  |  |  |
| Coping flexibility | 0.31 | 0.036 | 0.31 | <.001 |
| Active Coping: Problem Solving | 0.01 | 0.042 | 0.01 | .675 |
| Avoidance: Repression | 0.07 | 0.048 | 0.07 | .134 |
| Avoidance: Wishful Thinking | 0.22 | 0.038 | 0.22 | <.001 |
| Proactive Coping | 0.05 | 0.044 | 0.05 | .229 |
| Coping Fexibility ~~ |  |  |  |  |
| Active Coping: Problem Solving | 0.14 | 0.055 | 0.14 | .012 |
| Avoidance: Repression | -0.18 | 0.054 | -0.18 | .001 |
| Avoidance: Wishful Thinking | 0.03 | 0.042 | 0.03 | .419 |
| Proactive Coping | 0.20 | 0.045 | 0.20 | <.001 |
| Active Coping: Problem Solving ~~ |  |  |  |  |
| Avoidance: Repression | -0.25 | 0.062 | -0.25 | <.001 |
| Avoidance: Wishful Thinking | -0.15 | 0.050 | -0.15 | .003 |
| Proactive Coping | 0.52 | 0.056 | 0.52 | <.001 |
| Avoidance: Repression~~ |  |  |  |  |
| Avoidance: Wishful Thinking | 0.58 | 0.050 | 0.58 | <.001 |
| Proactive Coping | -0.01 | 0.057 | -0.01 | .802 |
| Avoidance: Wishful Thinking ~~ |  |  |  |  |
| Proactive Coping | -0.03 | 0.043 | -0.03 | .466 |
| **Variances** |  |  |  |  |
| CSI 1 | 0.45 | 0.028 | 0.45 | <.001 |
| CSI 7 | 0.45 | 0.028 | 0.45 | <.001 |
| CSI 25 | 0.42 | 0.024 | 0.42 | <.001 |
| CSI 32 | 0.49 | 0.025 | 0.49 | <.001 |
| CSI-SF 1 | 0.34 | 0.018 | 0.34 | <.001 |
| CSI-SF 19 | 0.30 | 0.016 | 0.30 | <.001 |
| Brief COPE 2 | 0.43 | 0.021 | 0.43 | <.001 |
| CSI 20 | 0.35 | 0.019 | 0.35 | <.001 |
| WCC-R 55 | 0.42 | 0.021 | 0.42 | <.001 |
| WCC-R 51 | 0.40 | 0.020 | 0.40 | <.001 |
| CSI-SF 22 | 0.30 | 0.020 | 0.30 | <.001 |
| CSI 24 | 0.36 | 0.022 | 0.36 | <.001 |
| CSI 31 | 0.33 | 0.020 | 0.33 | <.001 |
| CSI 12 | 0.54 | 0.027 | 0.54 | <.001 |
| CFS-R 8 | 0.47 | 0.029 | 0.47 | <.001 |
| CFS-R 6 | 0.29 | 0.019 | 0.29 | <.001 |
| CFS-R 4 | 0.37 | 0.026 | 0.37 | <.001 |
| CSI 9 | 0.41 | 0.038 | 0.41 | <.001 |
| Brief COPE 7 | 0.42 | 0.029 | 0.42 | <.001 |
| WCC-R 56 | 0.57 | 0.030 | 0.57 | <.001 |
| WCC-R 37 | 0.69 | 0.055 | 0.69 | <.001 |
| CSI 10 | 0.41 | 0.047 | 0.41 | <.001 |
| CSI 27 | 0.41 | 0.046 | 0.41 | <.001 |
| PCI 17 | 0.51 | 0.040 | 0.51 | <.001 |
| PCI 5 | 0.42 | 0.046 | 0.42 | <.001 |

*Note.* Model fit indices: χ2(247)=767.90, *p*<.001, *AIC*=75490.02, *BIC*=75893.70, *p*<.001. *CFI*=.93, *TLI*=.92, *RMSEA*=.040, *SRMR*=.036. CSI-SF=Coping Strategies Inventory Short Form; WCC-R=Ways of Coping Checklist revised; CSI=Coping Strategy Indicator; PCI=Proactive Coping Inventory; SCQ=Spiritual Coping Questionnaire; CFS-R=Coping Flexibility Scale revised.


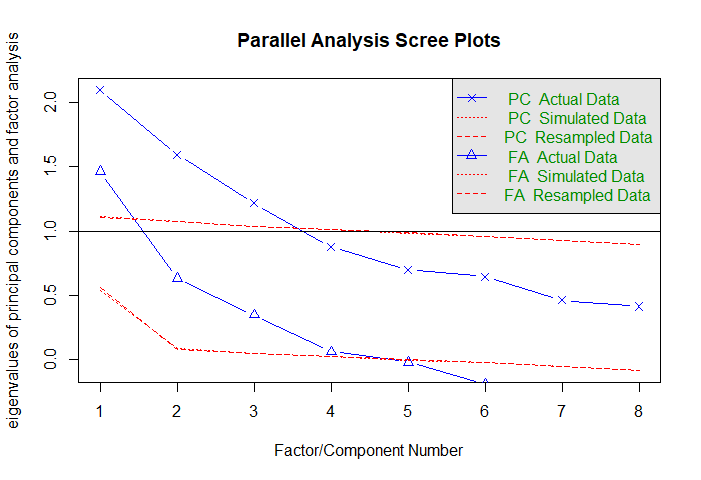


**Figure SUP3.2 Scree Plot with 8 items**

**Exploration of the 8-item version.** We selected 8 items as suggested by a brute-force approach based on the 16-item version and performed PA, MAP, VSS and EFA to explore the factorial structure. The PA suggested a number of 4 factors and 2 components (Figure S2.2).

The MAP reached a minimum of 0.04 with 2 factors and the VSS complexity reached a maximum of 0.60 with 4 factors. The model fit indices reached a minimum with four factors (BIC=12.70, sample size adjusted BIC=6.40 and SRMR=.004). Results from EFA indicated superior fit of the four-factorial structure (four factors: TLI=1.00, RMSEA=.01, RMSR=.01, BIC=13.76, R2=.42; two factors: TLI=.88, RMSEA=.06, RMSR=.04, BIC=17.14, R2=.29) and this findings was validated by the results from CFA (four factors: CFI=.99, TLI=.99, RMSEA=.024, RMSR=.020, AIC=25811.00, BIC=25924.86; two factors: CFI=.89, TLI=.84, RMSEA=.083, RMSR=.063, AIC=25984.38, BIC=26072.36).

**SUP4. Results from measurement invariance analyses**

**Table SUP4.1. Results from measurement invariance analyses across age groups, sexes at birth, coping situations and study locations for the 16-item short adult coping scale (SACS-16)**

|  | **Study 1** (*N*=2,613) | | | | | | **Study 2** (*N*=1,986) | | | | | |
| --- | --- | --- | --- | --- | --- | --- | --- | --- | --- | --- | --- | --- |
|  | ***CFI*** | ***TLI*** | ***R*** | ***S*** | **χ2** | ***p*** | ***CFI*** | ***TLI*** | ***R*** | ***S*** | **χ2** | ***p*** |
| **Age group** | |  |  |  |  |  |  |  |  |  |  |  |
| Config | .948 | .918 | .036 | .031 | 554.19 |  | .979 | .966 | .033 | .031 | 251.08 |  |
| Metric | .953 | .931 | .033 | .032 | 554.86 | .829 | .978 | .968 | .033 | .034 | 320.22 | .103 |
| Scalar | .944 | .923 | .034 | .033 | 622.34 | <.001 | .974 | .964 | .034 | .036 | 358.79 | <.001 |
| Strict | .934 | .921 | .035 | .036 | 716.72 | .002 | .971 | .965 | .034 | .039 | 403.57 | .050 |
| **Sex at birth** | |  |  |  |  |  |  |  |  |  |  |  |
| Config | .954 | .928 | .035 | .027 | 392.43 |  | .974 | .958 | .037 | .027 | 194.93 |  |
| Metric | .953 | .929 | .035 | .027 | 409.19 | .045 | .976 | .965 | .034 | .028 | 207.98 | .449 |
| Scalar | .943 | .919 | .037 | .029 | 468.38 | <.001 | .973 | .962 | .036 | .029 | 227.38 | <.001 |
| Strict | .939 | .920 | .037 | .030 | 505.45 | .004 | .972 | .963 | .035 | .030 | 244.49 | .018 |
| **Coping context** | | |  |  |  |  |  |  |  |  |  |  |
| Config | .962 | .941 | .030 | .031 | 548.50 |  | .979 | .967 | .033 | .024 | 293.12 |  |
| Metric | .963 | .946 | .029 | .033 | 578.57 | .436 | .979 | .969 | .032 | .027 | 371.05 | .338 |
| Scalar | .959 | .945 | .029 | .034 | 626.61 | .153 | .977 | .970 | .031 | .029 | 396.23 | .320 |
| Strict | .960 | .953 | .027 | .035 | 734.44 | .520 | .979 | .975 | .028 | .031 | 436.58 | .567 |
| **Study location** | |  |  |  |  |  |  |  |  |  |  |  |
| Config |  |  |  |  |  |  | .967 | .948 | .040 | .030 | 230.82 |  |
| Metric |  |  |  |  |  |  | .970 | .954 | .037 | .031 | 246.03 | .307 |
| Scalar |  |  |  |  |  |  | .965 | .950 | .039 | .032 | 275.98 | <.001 |
| Strict |  |  |  |  |  |  | .959 | .947 | .040 | .035 | 313.82 | <.001 |

*Note.**R*=RMSEA, *S*=SRMR,Config=Configural. Approximately 25% of the total sample was distributed across each of the 4 age groups 18-29, 30-44, 45-59, and 60-79 years, men and women (sex at birth) were relatively equal represented with 50.6% female.66.6% in Study 1 (58.2% in Study 2) reported thinking of about (one or more) concrete past situations from the areas of health (Study1: 23.9%, n=625; Study2: 14.3%,n=165), social relations (Study 1: 35.9%, n=912; Study 2: 25.3%,n=292), work (Study 1: 14.0%, n=365; Study 2: 16.0%, n=185), financial stress (Study 1: 14.6%, n=381; Study 2: 23.6%, n=273), 6.2% respectively 12.2% (Study 1: n=150; Study 2: 141) violence/discrimination/war, and 6.9% respectively 8.6% (Study 1: n=181; Study 2: n=99) reported of other not mentioned situations. The sample in Study 2 was composed of 50.1% adults living in Germany and 49.9% in the United Kingdom.

**Table SUP4.2. Results from measurement invariance analyses across age groups, sexes at birth, coping situations and study locations for the 8-item short adult coping scale (SACS-8)**

|  | **Study 1** (*N*=2,613) | | | | | | **Study 2** (*N*=1,986) | | | | | |
| --- | --- | --- | --- | --- | --- | --- | --- | --- | --- | --- | --- | --- |
|  | ***CFI*** | ***TLI*** | ***R*** | ***S*** | **χ2** | ***p*** | ***CFI*** | ***TLI*** | ***R*** | ***S*** | **χ2** | ***p*** |
| **Age group** | |  |  |  |  |  |  |  |  |  |  |  |
| Config | .975 | .949 | .038 | .025 | 108.57 |  | .982 | .965 | .039 | .026 | 54.46 |  |
| Metric | .975 | .959 | .034 | .027 | 118.84 | .484 | .980 | .968 | .037 | .030 | 70.18 | .231 |
| Scalar | .974 | .963 | .032 | .028 | 134.62 | .289 | .968 | .955 | .044 | .034 | 96.36 | <.001 |
| Strict | .960 | .957 | .035 | .033 | 185.49 | .019 | .964 | .961 | .041 | .038 | 115.63 | .212 |
| **Sex at birth** | |  |  |  |  |  |  |  |  |  |  |  |
| Config | .985 | .970 | .031 | .020 | 63.86 |  | .970 | .940 | .053 | .026 | 57.64 |  |
| Metric | .981 | .966 | .033 | .020 | 77.54 | .025 | .970 | .948 | .050 | .027 | 62.52 | .240 |
| Scalar | .968 | .951 | .040 | .026 | 110.77 | <.001 | .962 | .941 | .053 | .030 | 75.08 | <.001 |
| Strict | .939 | .920 | .041 | .029 | 139.46 | <.001 | .958 | .947 | .050 | .032 | 84.58 | .039 |
| **Coping context** | | |  |  |  |  |  |  |  |  |  |  |
| Config | .989 | .979 | .026 | .023 | 92.98 |  | .988 | .977 | .031 | .033 | 53.44 |  |
| Metric | .990 | .984 | .023 | .025 | 107.67 | .473 | .975 | .960 | .040 | .041 | 82.36 | .184 |
| Scalar | .987 | .970 | .031 | .029 | 148.80 | .043 | .973 | .964 | .039 | .043 | 94.18 | .388 |
| Strict | .982 | .981 | .025 | .031 | 173.64 | .619 | .970 | .969 | .036 | .050 | 121.08 | .363 |
| **Study location** | | |  |  |  |  |  |  |  |  |  |  |
| Config |  |  |  |  |  |  | .979 | .957 | .042 | .024 | 44.97 |  |
| Metric |  |  |  |  |  |  | .978 | .961 | .040 | .025 | 49.42 | .244 |
| Scalar |  |  |  |  |  |  | .965 | .946 | .047 | .030 | 70.11 | <.001 |
| Strict |  |  |  |  |  |  | .956 | .944 | .048 | .034 | 86.66 | <.001 |

*Note.**R*=RMSEA, *S*=SRMR,Config=Configural. Approximately 25% of the total sample was distributed across each of the 4 age groups 18-29, 30-44, 45-59, and 60-79 years, men and women (sex at birth) were relatively equal represented with 50.6% female.66.6% in Study 1 (58.2% in Study 2) reported thinking of about (one or more) concrete past situations from the areas of health (Study1: 23.9%, n=625; Study2: 14.3%,n=165), social relations (Study 1: 35.9%, n=912; Study 2: 25.3%,n=292), work (Study 1: 14.0%, n=365; Study 2: 16.0%, n=185), financial stress (Study 1: 14.6%, n=381; Study 2: 23.6%, n=273), 6.2% respectively 12.2% (Study 1: n=150; Study 2: 141) violence/discrimination/war, and 6.9% respectively 8.6% (Study 1: n=181; Study 2: n=99) reported of other not mentioned situations. The sample in Study 2 was composed of 50.1% adults living in Germany and 49.9% in the United Kingdom.
